# Supplementary material for: Preliminary Survey of Pathogens in the Asian Honey Bee (Apis cerana) in Thailand
Source: MDPI journal article supplement (doi:10.3390/life13020438), 2023-02-03
Supplement: s1 [file s1]

## Supplementary information

**Title:** Preliminary Survey of Pathogens in the Asian Honey Bee (*Apis cerana*) in Thailand

Patcharin Phokasem, Chainarong Sinpoo, Korrawat Attasopa, Sasiprapa Krongdang, Thunyarat Chantaphanwattana, Tial C. Ling, Jeffery S. Pettis, Panuwan Chantawannakul, Veeranan Chaimanee and Terd Disayathanoowat

**Table S1.** Sampling locations of specimens used in the current study including geographic coordinates, elevations, and sample codes.

| No. | Region of Thailand | Location (District, Province) | Sample code | Latitude   | Longitude   | Elevation (Meters above sea level) |
|-----|--------------------|-------------------------------|-------------|------------|-------------|------------------------------------|
| 1   | North              | Pongyang, Chiang Mai          | AC1         | 18°53'32"N | 98°50'00"E  | 750                                |
| 2   | North              | Pongyang, Chiang Mai          | AC2         | 18°53'32"N | 98°50'00"E  | 750                                |
| 3   | North              | Maerim, Chiang Mai            | AC3         | 18°54'30"N | 98°56'04"E  | 329                                |
| 4   | North              | Maerim, Chiang Mai            | AC4         | 18°54'30"N | 98°56'04"E  | 329                                |
| 5   | Northeast          | Si Chiang Mai, Nong Khai      | AC5         | 17°58'26"N | 102°23'53"E | 220                                |
| 6   | Northeast          | Si Chiang Mai, Nong Khai      | AC6         | 17°58'26"N | 102°23'53"E | 220                                |
| 7   | Northeast          | Si Chiang Mai, Nong Khai      | AC7         | 17°58'26"N | 102°23'53"E | 220                                |
| 8   | Northeast          | Mueang Khon Kaen, Khon Kaen   | AC8         | 16°27'26"N | 102°42'59"E | 178                                |
| 9   | South              | Mueang Chumphon, Chumphon     | AC9         | 10°27'33"N | 99°07'48"E  | 32                                 |
| 10  | South              | Mueang Chumphon, Chumphon     | AC10        | 10°27'33"N | 99°07'48"E  | 32                                 |
| 11  | South              | Ban Na San, Surat Thani       | AC11        | 8°49'29"N  | 99°21'53"E  | 58                                 |
| 12  | South              | Ban Na San, Surat Thani       | AC12        | 8°49'29"N  | 99°21'53"E  | 58                                 |
| 13  | South              | Ban Na San, Surat Thani       | AC13        | 8°49'29"N  | 99°21'53"E  | 58                                 |
| 14  | South              | Thong Krut, Samui island      | AC14        | 9°25'12"N  | 99°57'36"E  | 8                                  |
| 15  | South              | Thong Krut, Samui island      | AC15        | 9°25'15"N  | 99°58'34"E  | 8                                  |
| 16  | South              | Thong Krut, Samui island      | AC16        | 9°25'15"N  | 99°58'34"E  | 8                                  |
| 17  | South              | Thong Krut, Samui island      | AC17        | 9°25'15"N  | 99°58'34"E  | 8                                  |
| 18  | South              | Taliang Ngam, Samui island    | AC18        | 9°25'15"N  | 99°58'34"E  | 11                                 |
| 19  | South              | Lipa Noi, Samui island        | AC19        | 9°30'12"N  | 99°56'53"E  | 20                                 |
| 20  | South              | Lipa Noi, Samui island        | AC20        | 9°30'12"N  | 99°56'53"E  | 20                                 |
| 21  | South              | Lipa Noi, Samui island        | AC21        | 9°30'12"N  | 99°56'53"E  | 20                                 |
| 22  | South              | Pha-ngan, Pha-ngan island     | AC22        | 9°42'46"N  | 100°00'24"E | 12                                 |
| 23  | South              | Pha-ngan, Pha-ngan island     | AC23        | 9°42'46"N  | 100°00'24"E | 12                                 |
| 24  | South              | Pha-ngan, Pha-ngan island     | AC24        | 9°42'46"N  | 100°00'24"E | 12                                 |

**Table S2.** Primers used for molecular amplification of pathogens, and mtDNA detection in the current study.

| Target                                        | Primer Name      | Sequence                      | Produce size | Reference |
|-----------------------------------------------|------------------|-------------------------------|--------------|-----------|
| <i>Ascosphaera apis</i>                       | ITS primers 3-F1 | TGTCTGTGCGGCTAGGTG            | 500          | [28]      |
|                                               | AscoAll2         | GAWCACGACGCCGTCCT             |              |           |
| <i>Paenibacillus larvae</i>                   | Paenib-F         | CTTGTTTCTTTCGGGAGACGCCA       | 1101         | [29]      |
|                                               | Paenib-R         | TCTTAGAGTGCCACCTCTGCG         |              |           |
| <i>Nosema apis</i>                            | Napis-SSU-Jf1    | CCATGCATGCTTTGACGTACTATG      | 325          | [30]      |
|                                               | Napis-SSU-Jr1    | GCTCACATACGTTTAAAAATG         |              |           |
| <i>Nosema ceranae</i>                         | SSUrRNA-f1       | CACCAGGTTGATTCTGCCT           | 540          | [31]      |
|                                               | SSUrRNA-r1b      | TGTTCTGCCAGTCAGGGTCGTCA       |              |           |
| <i>Nosema bombi</i>                           | Nbombi-SSU-Jf1   | CCATGCATGTTTTGAAGATTATTAT     | 323          | [30]      |
|                                               | Nbombi-SSU-Jr1   | CATATATTTTTAAAAATATGAAACAATAA |              |           |
| <i>Crithidia bombi</i>                        | Crith-F          | GGAAACCACGGAATCACATAGACC      | 500          | [17]      |
|                                               | Crith-R          | AGGAAGCCAAGTCATCCATCGC        |              |           |
| LSV complex                                   | LSVdeg-F         | GCCWCGRYTGTTGGTYCCCCC         | 578          | [32]      |
|                                               | LSVdeg-R         | GAGGTGGCGGCGCSAGATAAAAGT      |              |           |
| aphid lethal paralysis virus strain Brookings | ALP-Br-F-2936    | AACGTCGTATGCTACGATGAACTCG     | 646          | [33]      |
|                                               | ALP-Br-R-3400    | GGGTAAATTC AATTCAGTACCACGG    |              |           |
| Big Sioux River virus                         | BSRV_4714F       | RGTGCAGCTTTATGCGTTGCC         | 519          | [33]      |
|                                               | BSRV_37R         | CCGCTGTTGAGAATAAGGATATCCAGG   |              |           |
| Acute bee paralysis virus                     | ABPV-F           | CTCAAGTTATACGTAAGTAGCTGGAATT  | 646          | [34]      |
|                                               | ABPV-R           | AACCAACCTTGCTTCCCTTTA         |              |           |
| Black queen cell virus                        | BQCV-F           | TGGTCAGTCCCCTACCTTAAAC        | 700          | [35]      |
|                                               | BQCV-R           | GCAACAAGAAGAAACGTAAACCAC      |              |           |
| Chronic bee paralysis virus                   | CBPV-F           | AGTTGTCATGGTTAACAGGATACGAG    | 455          | [36]      |
|                                               | CBPV-R           | TCTAATCTTAGCACGAAAGCCGAG      |              |           |
| Deformed wing virus A                         | DWV-A-F          | ATCAGCGCTTAGTGGAGGAA          | 702          | [37]      |
|                                               | DWV-A-R          | TCGACAATTTTCGGACATCA          |              |           |
| Deformed wing virus B                         | DWV-B-F          | CATGGAAATGGGATCAAACC          | 722          | [38]      |
|                                               | DWV-B-R          | CTTCAAGGGCTCATCCATA           |              |           |
| Israeli acute paralysis virus                 | IAPV-F           | GAAGGTTTGGGARGCYCCAYTWTGTAT   | 706          | [39]      |
|                                               | IAPV-R           | TGTTTGCRTCGGCHGTWGTTCWGCAA    |              |           |
| Kashmir bee virus                             | KBV-F            | GATGAACGTCGACCTATTGA          | 415          | [40]      |
|                                               | KBV-R            | TGTGGGTTGGCTATGAGTCA          |              |           |
| Sacbrood virus                                | SBV-F            | GCTGAGGTAGGATCTTTGCGT         | 824          | [41]      |

|                                                           |                  |                            |     |      |
|-----------------------------------------------------------|------------------|----------------------------|-----|------|
|                                                           |                  |                            |     |      |
|                                                           | SBV-R            | TCATCATCTTCACCATCCGA       |     |      |
| Slow bee paralysis virus                                  | SBPV-F           | GAGATGGATMGRCTGAAGG        | 915 | [42] |
|                                                           | SBPV-R           | CATGAGCCCAKGARTGTGAA       |     |      |
| Housekeeping genes                                        | RPS5-F           | AATTATTGGTCGCTGGAATTG      | 115 | [43] |
|                                                           | RPS5-R           | TAACGTCCAGCAGAATGTGGTA     |     |      |
|                                                           | $\beta$ -actin-F | TTGTATGCCAACACTGTCCTTT     | 271 | [44] |
|                                                           | $\beta$ -actin-R | TGGCGCGATGATCTTAATTT       |     |      |
| Cytochrome <i>c</i> oxidase subunit I ( <i>COI</i> ) gene | LCO1490          | GGTCAACAAATCATAAAGATATTGG  | 658 | [45] |
|                                                           | HCO2198          | TAAACTTCAGGGTGACCAAAAAATCA |     |      |

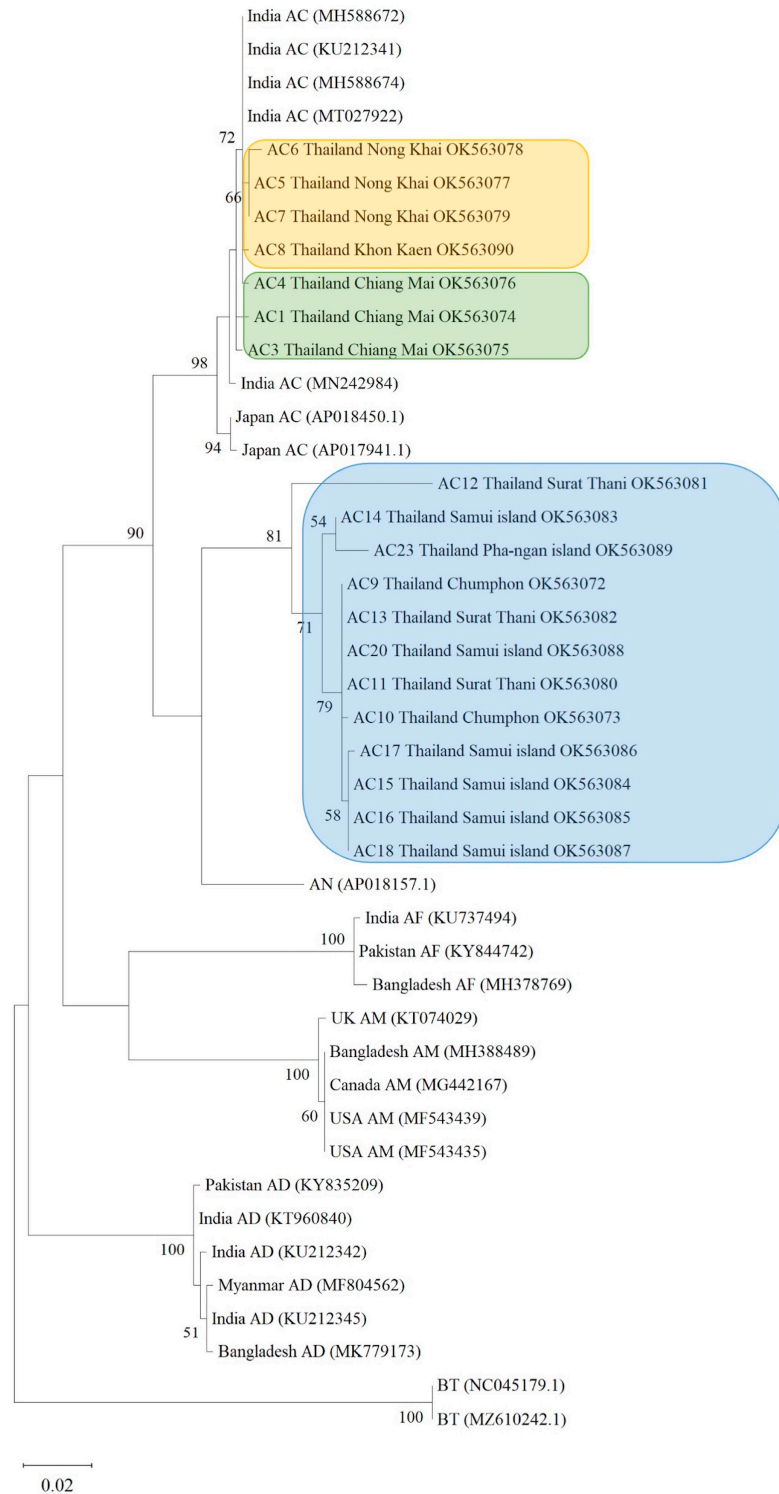

**Figure S1** The phylogenetic tree based on cytochrome *c* oxidase subunit I (COI) sequences of *Apis cerana* collected in Thailand using maximum likelihood analysis. The sequences of *Bombus terrestris*–MZ610242.1 and NC045179.1 were used as an out group species. Numbers at each node represent bootstrap values as percentages are shown. The taxon name in yellow square denotes the sample from northeast region. The taxon name in green square denotes the sample from north region. The taxon name in blue square denotes the sample from south region. Abbreviations: AC=*Apis cerana*; AM= *Apis mellifera*; AF= *Apis florea*; AD=*Apis dorsata*; AN=*Apis nuluensis*; BT= *Bombus terrestris*.

**Table S3.** The sequences of *Nosema* spp., LSV, BQCV, ABPV , and bee specimens of our study including other related sequences obtained from GenBank used in our phylogenetic tree analyses showing GenBank accession numbers.

| Phylogeny                                                                 | Accession no.                                                                                                                                                                                |                                                                                                                                                                                                                                                          |
|---------------------------------------------------------------------------|----------------------------------------------------------------------------------------------------------------------------------------------------------------------------------------------|----------------------------------------------------------------------------------------------------------------------------------------------------------------------------------------------------------------------------------------------------------|
|                                                                           | This study                                                                                                                                                                                   | GenBank sequences/ references                                                                                                                                                                                                                            |
| <i>Nosema</i> spp.                                                        | OM194007, OM194008, OK605057, OK605059, OK605060, OK605058, OK605061, OM194009                                                                                                               | XR002966746.1, JX205150.1, JN872260.1, X73894.1, AY741105.1, EU219086.1, U27359.1, U11047.1, GU131121.1, KF640594.1, AY741110.1                                                                                                                          |
| Lake Sinai Virus (LSV)                                                    | OM970785, OM970786, OM970784, OM970787, OM970782, OM970783                                                                                                                                   | MF667763.1, JQ480620.1, KM886913.1, KY465720.1, LC646158.1, MH350883.1, MW397636.1, MZ821904.1, MZ821917.1, MZ821787.1                                                                                                                                   |
| Black Queen Cell Virus (BQCV)                                             | OM743280                                                                                                                                                                                     | KP730025.1, KP730027.1, KP730026.1, KP730014.1, KP730008.1, KP730004.1, MZ821805.1, JN379018.1, KM255693.1, MZ821803.1, EU375535.1, MN902108.1                                                                                                           |
| Acute Bee Paralysis Virus (ABPV)                                          | ON018727                                                                                                                                                                                     | AF486072.2, MZ821774.1, OK491519.1, HM228892.1, MZ821771.1, MZ821775.1, MZ821776.1, AF486073.2, MZ821779.1                                                                                                                                               |
| Bee specimens (Cytochrome <i>c</i> oxidase subunit I ( <i>COI</i> ) gene) | OK563072, OK563073, OK563074, OK563075, OK563076, OK563077, OK563078, OK563079, OK563080, OK563081, OK563082, OK563083, OK563084, OK563085, OK563086, OK563087, OK563088, OK563089, OK563090 | KU212345, MK779173, MF804562, KU212342, KT960840, KY835209, MT027922, MH588674, MH588672, KU212341, MN242984, MH388489, MG442167, MF543439, MF543435, KT074029, KU737494, MH378769, KY844742, AP018450.1, AP017941.4, AP018157.1, NC045179.1, MZ610242.1 |
